# Supplementary material
Source: PubMed Central journal article supplement (PMC3970559)
Supplement: supp_127.7.1476_JCS138495.pdf [file supp_127.7.1476_JCS138495.pdf]

```

Zebrafish  -----MIERPDSAVSSVAQRNLEGYVGFANLPNQVYRKSVKRGFEFTLMVVGESGL
Human      MSVSARSAAAEEERSVNSSTMGQQKNLEGYVGFANLPNQVYRKSVKRGFEFTLMVVGESGL
Mouse      MSVSARSAAAEEERSVNCGTMAQPKNLEGYVGFANLPNQVYRKSVKRGFEFTLMVVGESGL
          **  . . : : *****
Zebrafish  GKSTLINSFLFLTDLYSKDYPGPSQRIKKTVQVEQSKVLIKEGGVQLTLTIVDTPGFGDAV
Human      GKSTLINSFLFLTDLYSPEYPGPSHRIKKTVQVEQSKVLIKEGGVQLLLTIVDTPGFGDAV
Mouse      GKSTLINSFLFLTDLYSPEYPGPSHRIKKTVQVEQSKVLIKEGGVQLLLTIVDTPGFGDAV
          ***** : ***** *****
Zebrafish  DNSNCWQPVINYIDSKFEDFLNAESRVNRRQMPDNRVHCCLYFIAPSGHGLKPLDIEFMK
Human      DNSNCWQPVIDYIDSKFEDYLNAESRVNRRQMPDNRVQCCLYFIAPSGHGLKPLDIEFMK
Mouse      DNSNCWQPVIDYIDSKFEDYLNAESRVNRRQMPDNRVQCCLYFIAPSGHGLKPLDIEFMK
          ***** : ***** *****
Zebrafish  RLHDKVNVIIPLIAKADTLTPEECQQLFKKQIMKEIQEHKIKIYEFPDTEDEEDSKLIRKIK
Human      RLHEKVNIIPLIAKADTLTPEECQQFQKQIMKEIQEHKIKIYEFPETDDEEENKLVKKIK
mouse      RLHEKVNIIPLIAKADTLTPEECQQFQKQIMKEIQEHKIKIYEFPETDDEEENKLVKKIK
          *** : *** : ***** ***** : * : * : * : * : * : * : *
Zebrafish  EKMP LAVVGSNVVIEVNGRKRVRGRQYPWGVAEVENGEHCDFTVLRNMLIRTHMQDLKDVT
Human      DRLPLAVVGSNTIIEVNGKRVRGRQYPWGVAEVENGEHCDFTILRNMLIRTHMQDLKDVT
Mouse      DRLPLAVVGSNTIIEVNGKRVRGRQYPWGVAEVENGEHCDFTILRNMLIRTHMQDLKDVT
          : : : ***** : ***** : ***** : ***** : *****
Zebrafish  NNVHYENYRSKKLAAVTCNGVDATKNKGQLTKSPLAQMEERREHVMMKKKMEMEQVF
Human      NNVHYENYRSRKLAAVTYNGVDNNKNKGQLTKSPLAQMEERREHVAKMKKMEMEQVF
Mouse      NNVHYENYRSRKLAAVTYNGVDNNKNKGQLTKSPLAQMEERREHVAKMKKMEMEQVF
          ***** : ***** ***** . ***** ***** *****
Zebrafish  EMKVKEKKQKLDSEAELERRHEQMKNLEAQYKELEEKRRQFEDEKANWEAQQRILEQQ
Human      EMKVKEKVQKLDSEAELEQRRHEQMKNLEAQHKELEEKRRQFEDEKANWEAQQRILEQQ
Mouse      EMKVKEKVQKLDSEAELEQRRHEQMKNLEAQHKELEEKRRQFEDEKANWEAQQRILEQQ
          ***** ***** ***** : ***** ***** : ***** *****
Zebrafish  KLDASKTMEKNKKKGIKIF
Human      N--SSRTLEKNKKKGIKIF
Mouse      N--SSRTLEKNKKKGIKIF
          : : * : * : *****

```

**Fig. S1.** Sequence alignment of septin 7 (Sept7b ENSDARG00000019649) proteins of zebrafish (*Danio rerio*), *Homo sapiens* (Sept 7-201 ENST00000350320, Chromosome-7), and *Mus musculus* (Sept7-201 ENSMUST00000060080 Chromosome-9). Septin 7 protein sequences were aligned with *ClustalW*. Zebrafish sept7b protein shares significant amino acid sequence similarity and identity with its mammalian counterparts.

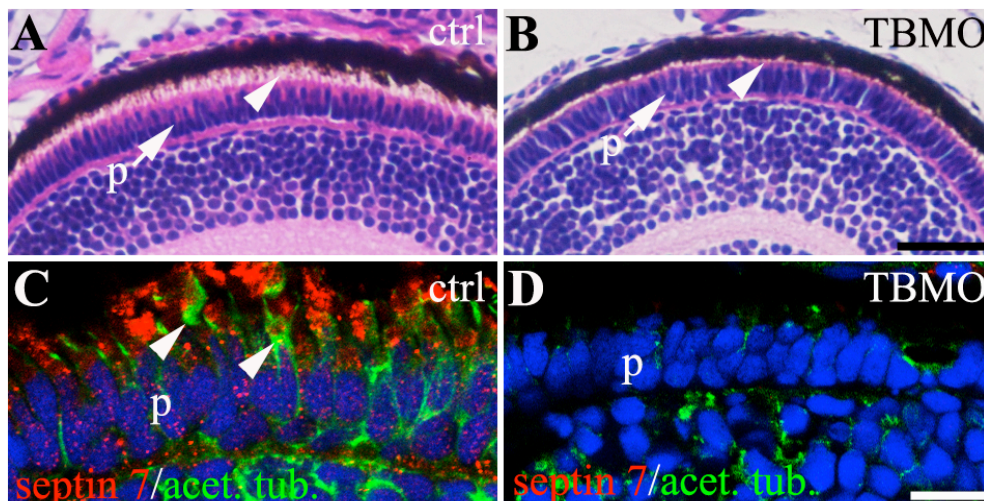

**Fig. S2. *Sept7b* is required for the development of photoreceptor outer segment.** (A) Hematoxylin-eosin stained histological section of 4 dpf zebrafish larva showing the photoreceptor cell layer (p). The photoreceptor outer segment, that comprises modified cilia, is marked with an arrowhead. (B) Histological section of 4 dpf *sept7b* translation blocking antisense morpholino oligonucleotide (TBMO)-treated zebrafish larva shows shortening of the photoreceptor (p) outer segment cilia (arrowhead). (C-D) Immunofluorescence staining of 4 dpf control (C) and *sept7b* TBMO-treated zebrafish (D) for septin (red) and acetylated tubulin (green). (C) Septin 7 localizes in a punctate fashion in the photoreceptor cells in the control, and the photoreceptor outer segment is visualized by acetylated tubulin (arrowheads). (D) The photoreceptor outer segment cilia are absent or clearly shorter in *sept7b* TBMO-treated zebrafish larva. Scale bar: 25  $\mu\text{m}$  (A-B); 10 $\mu\text{m}$  (C-D).

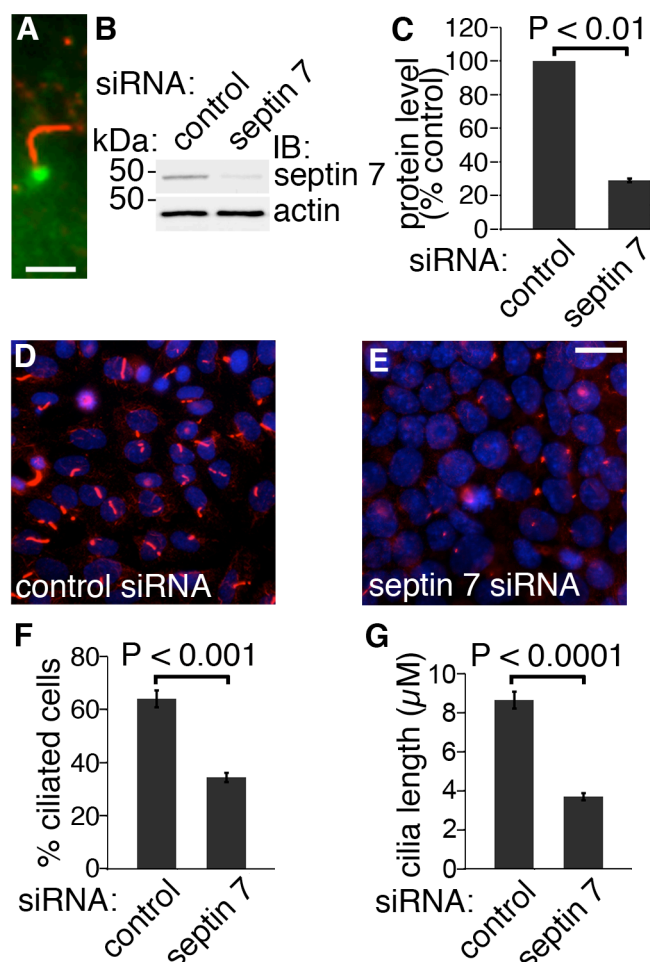

**Fig. S3. Knockdown of septin 7 decreases the length of cilia in mIMCD3 cells.** (A) In mIMCD3 cells, septin 7 (green) is expressed at the base of cilia, which are stained for acetylated tubulin (red). Scale bar: 2,5  $\mu\text{m}$ . (B) mIMCD3 cells were transfected with 100 nmol ON-TARGET plus SMARTpool mouse Sept7 (L-042160-01-0005) or siCONTROL Non-Targeting Pool#2 (D-001206-14-05) siRNAs (Dharmacon, Lafayette, CO) using Lipofectamine 2000 (Invitrogen). Septin 7 siRNA leads to a 71% reduction in septin 7 expression in mIMCD3 cells. Actin was used as a loading control. (C) Quantification of protein levels of three replicate blots as in (B). (D-E) mIMCD3 cells treated with control siRNA (D) are decorated with cilia identified by staining for acetylated tubulin (red). In mIMCD3 cells transfected with septin 7 siRNA (E), the number and length of cilia are reduced. Nuclei are visualized with Hoechst stain (blue). Scale bar: 10  $\mu\text{m}$ . (F) Quantification of 4000 cells indicates that 64% of cells transfected with the control siRNA had cilia whereas only 34.5% of cells transfected with septin 7 siRNA were ciliated. (G) Cilia length is reduced in septin 7 siRNA treated cells ( $3.69 \pm 0.47 \mu\text{m}$ ) compared to control siRNA transfected cells ( $8.86 \pm 0.63 \mu\text{m}$ ;  $n=200$  for both). Graphs in C, F and G show the mean and error bars (STDEV) of three independent experiments, Student's t-test.

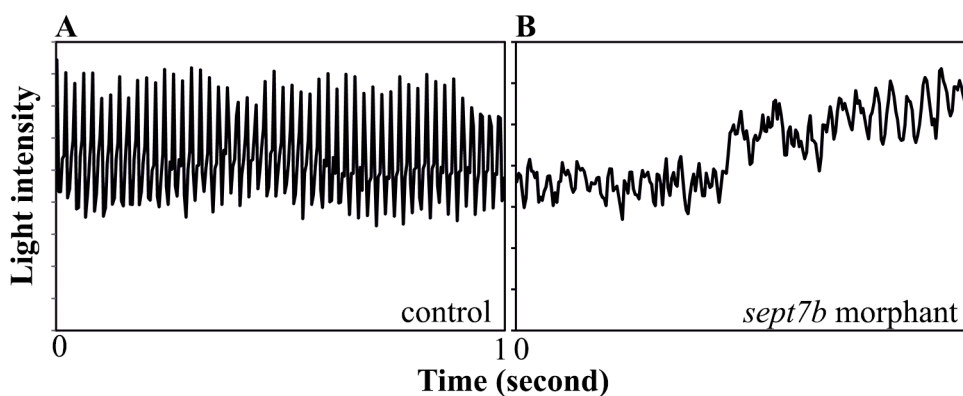

**Fig. S4. Knockdown of *sept7b* leads to slow and irregular beating of the cilia. (A-B)** The beating frequency of the pronephric cilia at 30 hpf control and *sept7b* TBMO-injected zebrafish was quantified based on the changes in the light intensity averaged over a region of interest placed on the path of the beating cilia. Each trace is 1 s in duration, and the curve shows the oscillations originating from the cilia. Beating of the cilia is regular in controls (A), whereas the beating is slow and the beat pattern is irregular in *sept7b* morphants (B).

| <b>Primers</b>                               |                            |
|----------------------------------------------|----------------------------|
| sept7b-1F                                    | 5'-TCTTCTGCTCTCGACCGCTT-3' |
| sept7b-1R                                    | 5'-ATCCCTCTGTGTGGTTTGAC-3' |
| sept7b-2F                                    | 5'-TCACGGTCCTGAGGAATATG-3' |
| sept7b-2R                                    | 5'-GATGAAGTTGCGTGTGGTTG-3' |
| sept7b-3F                                    | 5'-GTCACAGGACAATGATCGAG-3' |
| sept7b-3R                                    | 5'-CCACAGCCAGAGGCATCTTC-3' |
| sept7b-4F                                    | 5'-GTGTCCAGCGTTGCACAGAG-3' |
| sept7b-4R                                    | 5'-TCACCGACAACCATGAGCGT-3' |
| sept7b-5F                                    | 5'-GTTGCACAGAGGAATCTGGA-3' |
| sept7b-5R                                    | 5'-CCAGACTCACCGACAACCAT-3' |
| rps3-1F                                      | 5'-GCTCGCCGAGGATGGTTATT-3' |
| rps3-1R                                      | 5'-CGGTGTCGACGTAGTAGTTC-3' |
| rps3-2F                                      | 5'-CGTGTCACACCAACAAGA-3'   |
| rps3-2R                                      | 5'-CAGCTTGTAGCGCAGAGA-3'   |
| <b>Morpholino antisense oligonucleotides</b> |                            |
| TBMO                                         | TCGGGTCTCTCGATCATTGTCCTGT  |
| SBMO-2                                       | AGAATTTAGCAACTTACCGACAACC  |
| TBMO-MM                                      | TCcGcTCTCTgGATgATTcTCCTGT  |
| p53                                          | GCGCCATTGCTTTGCAAGAATTG    |

**Table S1. Primers and morpholino antisense oligonucleotides used in the study.** TBMO targets the translation initiation site of *sept7b* and SBMO-2 targets the exon splice donor site of exon 2. The control MO, TBMO-MM, corresponds to the sequence of TBMO but harbours five mismatching nucleotides marked by lowercase letters.

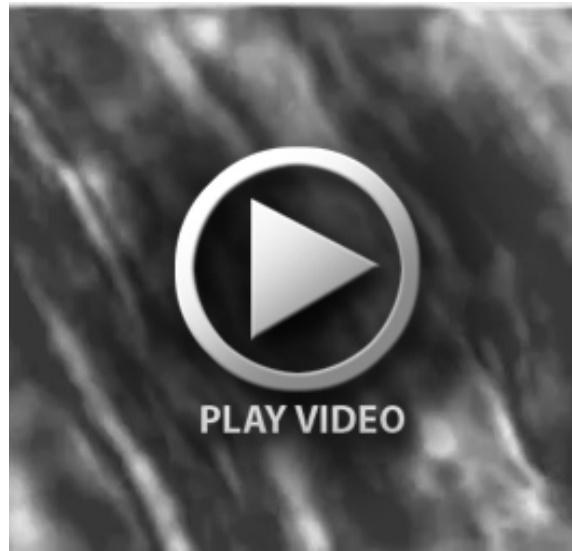

**Movie S1. High-speed video microscopy of the pronephric cilia in 30 hpf control zebrafish.** The movie shows the beating of the cilia (red arrow in a frame of the movie above). The movie was recorded at 250 frames/second.

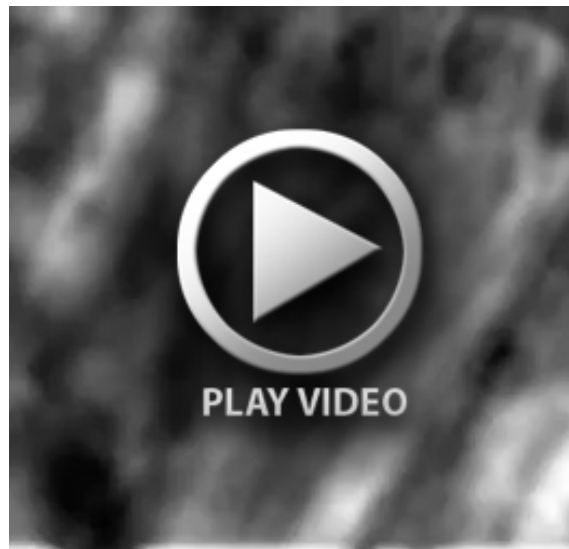

**Movie S2. High-speed video microscopy of the pronephric cilia in 30 hpf *sept7b* morphant zebrafish.** The movie shows that the beating rate of the cilia is reduced and the beat pattern is irregular in *sept7b* TBMO-injected zebrafish (red arrow in a frame of the movie above). The movie was recorded at 250 frames/second.
